# Supplementary material for: Simultaneous genome-wide gene expression and transcript isoform profiling in the human malaria parasite
Source: PLoS One. 2017 Nov 7;12(11):e0187595. doi: 10.1371/journal.pone.0187595 (PMC5675406; doi:10.1371/journal.pone.0187595)
Supplement: S1 Table — All genes that were up-regulated on any array are represented in column A. The “X” symbol is used to indicate in which array and replicate the gene was found to be up-regulated. (CSV) [file pone.0187595.s001.csv]

Up-regulated Genes	Nimblegen_rep2	Nimblegen_rep1	Agilent_15K	Agilent_HD_exon
PF3D7_0101000			X
PF3D7_0101300				X
PF3D7_0101500				X
PF3D7_0102600			X
PF3D7_0109700				X
PF3D7_0113000			X
PF3D7_0113300	X			X
PF3D7_0113900				X
PF3D7_0114500	X		X	X
PF3D7_0115600				X
PF3D7_0200500				X
PF3D7_0201600	X	X	X
PF3D7_0201700	X			X
PF3D7_0201800	X	X	X	X
PF3D7_0201900			X
PF3D7_0202000			X
PF3D7_0202200	X			X
PF3D7_0204300				X
PF3D7_0205400				X
PF3D7_0205500				X
PF3D7_0208200				X
PF3D7_0208300				X
PF3D7_0209200				X
PF3D7_0209900	X			X
PF3D7_0213700	X			X
PF3D7_0220100				X
PF3D7_0220300	X	X	X	X
PF3D7_0220500	X
PF3D7_0220600			X
PF3D7_0221500				X
PF3D7_0222600			X
PF3D7_0300200				X
PF3D7_0300700			X	X
PF3D7_0301700	X			X
PF3D7_0302000	X
PF3D7_0306300				X
PF3D7_0310300				X
PF3D7_0313400				X
PF3D7_0314400	X			X
PF3D7_0314500				X
PF3D7_0315800				X
PF3D7_0316600	X			X
PF3D7_0318600				X
PF3D7_0319700				X
PF3D7_0319800				X
PF3D7_0322800				X
PF3D7_0323800				X
PF3D7_0324100			X
PF3D7_0324800		X
PF3D7_0400300				X
PF3D7_0400500			X
PF3D7_0400900			X
PF3D7_0401200				X
PF3D7_0401300				X
PF3D7_0401400		X	X
PF3D7_0401500		X	X	X
PF3D7_0401800			X
PF3D7_0403300				X
PF3D7_0404600	X			X
PF3D7_0411000	X		X	X
PF3D7_0415100				X
PF3D7_0418400	X			X
PF3D7_0421500			X
PF3D7_0422000	X			X
PF3D7_0424700	X		X	X
PF3D7_0424800				X
PF3D7_0424900	X			X
PF3D7_0425800		X
PF3D7_0501000	X			X
PF3D7_0501200			X
PF3D7_0501300				X
PF3D7_0502400	X
PF3D7_0502800	X			X
PF3D7_0502900				X
PF3D7_0505000				X
PF3D7_0505800	X			X
PF3D7_0506100				X
PF3D7_0506200				X
PF3D7_0509400	X			X
PF3D7_0512100				X
PF3D7_0513300				X
PF3D7_0516200				X
PF3D7_0516300				X
PF3D7_0517200				X
PF3D7_0520600	X			X
PF3D7_0521800				X
PF3D7_0525000			X
PF3D7_0525500				X
PF3D7_0528200				X
PF3D7_0528800	X			X
PF3D7_0528900				X
PF3D7_0531400				X
PF3D7_0532300	X		X	X
PF3D7_0532400			X
PF3D7_0532500		X
PF3D7_0532600		X	X
PF3D7_0601900			X	X
PF3D7_0602100				X
PF3D7_0602800				X
PF3D7_0606200				X
PF3D7_0606900				X
PF3D7_0607300				X
PF3D7_0608310				X
PF3D7_0610500				X
PF3D7_0610700				X
PF3D7_0616000				X
PF3D7_0619100				X
PF3D7_0621200			X
PF3D7_0621300	X			X
PF3D7_0625400	X			X
PF3D7_0626500				X
PF3D7_0631800	X
PF3D7_0632600				X
PF3D7_0701600				X
PF3D7_0702200	X			X
PF3D7_0702300	X			X
PF3D7_0702400			X	X
PF3D7_0702500	X		X	X
PF3D7_0703100				X
PF3D7_0704200				X
PF3D7_0708100	X			X
PF3D7_0709000				X
PF3D7_0709600				X
PF3D7_0710400				X
PF3D7_0711100				X
PF3D7_0713100		X	X
PF3D7_0715000				X
PF3D7_0719600	X			X
PF3D7_0722300				X
PF3D7_0723100				X
PF3D7_0725200				X
PF3D7_0725300				X
PF3D7_0729300				X
PF3D7_0730900		X	X
PF3D7_0731100	X			X
PF3D7_0732400				X
PF3D7_0732500				X
PF3D7_0800800				X
PF3D7_0801500				X
PF3D7_0804800				X
PF3D7_0808900			X
PF3D7_0809200				X
PF3D7_0809500				X
PF3D7_0811500				X
PF3D7_0812700				X
PF3D7_0814300				X
PF3D7_0814500				X
PF3D7_0816500				X
PF3D7_0818400				X
PF3D7_0819100				X
PF3D7_0822300				X
PF3D7_0822800				X
PF3D7_0823700				X
PF3D7_0824600				X
PF3D7_0824900				X
PF3D7_0830300				X
PF3D7_0830400	X			X
PF3D7_0830600	X			X
PF3D7_0830700			X
PF3D7_0830900				X
PF3D7_0831400		X	X
PF3D7_0831800				X
PF3D7_0833000				X
PF3D7_0900300			X
PF3D7_0900900			X	X
PF3D7_0902300	X			X
PF3D7_0902400				X
PF3D7_0903100				X
PF3D7_0906500				X
PF3D7_0906600				X
PF3D7_0909900				X
PF3D7_0912800				X
PF3D7_0913000				X
PF3D7_0918800				X
PF3D7_0919700				X
PF3D7_0921200				X
PF3D7_0922100				X
PF3D7_0923000				X
PF3D7_0923200				X
PF3D7_0925100				X
PF3D7_0925200				X
PF3D7_0928900	X			X
PF3D7_0929000				X
PF3D7_0930700				X
PF3D7_0931100	X			X
PF3D7_0935100	X			X
PF3D7_0935900	X	X	X	X
PF3D7_0936200			X	X
PF3D7_0936300				X
PF3D7_0936400	X			X
PF3D7_0936600				X
PF3D7_0936800	X	X	X	X
PF3D7_0937400	X			X
PF3D7_1000600		X		X
PF3D7_1001000			X
PF3D7_1001400	X
PF3D7_1002100				X
PF3D7_1006800	X			X
PF3D7_1009100				X
PF3D7_1009200				X
PF3D7_1013100				X
PF3D7_1016700				X
PF3D7_1022300				X
PF3D7_1027100				X
PF3D7_1032900				X
PF3D7_1033400	X			X
PF3D7_1035800	X	X	X	X
PF3D7_1038200	X
PF3D7_1039000		X	X
PF3D7_1041300	X
PF3D7_1100400				X
PF3D7_1101300				X
PF3D7_1102900				X
PF3D7_1103600				X
PF3D7_1107500				X
PF3D7_1108900	X			X
PF3D7_1112000				X
PF3D7_1113200				X
PF3D7_1116700				X
PF3D7_1116800				X
PF3D7_1119200	X			X
PF3D7_1123600				X
PF3D7_1126500				X
PF3D7_1127300				X
PF3D7_1133700				X
PF3D7_1134200				X
PF3D7_1134700				X
PF3D7_1135700	X			X
PF3D7_1139100				X
PF3D7_1139300	X			X
PF3D7_1142700				X
PF3D7_1143900				X
PF3D7_1144000				X
PF3D7_1147800.1	X
PF3D7_1148700	X	X	X	X
PF3D7_1149400			X
PF3D7_1149800				X
PF3D7_1150300			X	X
PF3D7_1200500				X
PF3D7_1200800				X
PF3D7_1200900				X
PF3D7_1201100	X	X	X
PF3D7_1201500				X
PF3D7_1202700	X
PF3D7_1202800	X			X
PF3D7_1204600	X			X
PF3D7_1210300	X			X
PF3D7_1213700				X
PF3D7_1215300				X
PF3D7_1216200				X
PF3D7_1216500				X
PF3D7_1221900			X	X
PF3D7_1224400				X
PF3D7_1224600				X
PF3D7_1229100				X
PF3D7_1236100				X
PF3D7_1236600				X
PF3D7_1240000				X
PF3D7_1244500				X
PF3D7_1249100				X
PF3D7_1251600				X
PF3D7_1252300			X
PF3D7_1253100	X			X
PF3D7_1253200				X
PF3D7_1253700		X
PF3D7_1254100			X
PF3D7_1300200			X	X
PF3D7_1300500				X
PF3D7_1300900			X
PF3D7_1301300			X
PF3D7_1301400	X	X	X
PF3D7_1301700	X		X	X
PF3D7_1302000	X			X
PF3D7_1303300				X
PF3D7_1304900				X
PF3D7_1307100				X
PF3D7_1309000				X
PF3D7_1309600				X
PF3D7_1310800				X
PF3D7_1317200				X
PF3D7_1317700	X			X
PF3D7_1317900	X			X
PF3D7_1319300				X
PF3D7_1323000	X			X
PF3D7_1325000				X
PF3D7_1327800				X
PF3D7_1329500	X			X
PF3D7_1332700				X
PF3D7_1332800				X
PF3D7_1333000	X
PF3D7_1333600				X
PF3D7_1334700				X
PF3D7_1337300				X
PF3D7_1337400				X
PF3D7_1340300				X
PF3D7_1342900				X
PF3D7_1345000				X
PF3D7_1348300				X
PF3D7_1349000				X
PF3D7_1350300				X
PF3D7_1352200				X
PF3D7_1353100	X		X	X
PF3D7_1353200				X
PF3D7_1354600				X
PF3D7_1356200	X			X
PF3D7_1357700				X
PF3D7_1357900			X
PF3D7_1359000				X
PF3D7_1360100				X
PF3D7_1360400				X
PF3D7_1361000				X
PF3D7_1363000				X
PF3D7_1364500				X
PF3D7_1365400				X
PF3D7_1367400				X
PF3D7_1369500				X
PF3D7_1369700				X
PF3D7_1370300	X			X
PF3D7_1372200				X
PF3D7_1372700		X
PF3D7_1372800		X	X
PF3D7_1400200				X
PF3D7_1400400				X
PF3D7_1401100				X
PF3D7_1401300			X
PF3D7_1401500	X	X	X	X
PF3D7_1402100				X
PF3D7_1404500				X
PF3D7_1404800	X			X
PF3D7_1405500				X
PF3D7_1407500	X			X
PF3D7_1408500	X			X
PF3D7_1409000	X
PF3D7_1411500				X
PF3D7_1411900				X
PF3D7_1414700				X
PF3D7_1415800				X
PF3D7_1419300				X
PF3D7_1420300				X
PF3D7_1423400				X
PF3D7_1423500				X
PF3D7_1423700				X
PF3D7_1425900	X			X
PF3D7_1427100				X
PF3D7_1429500				X
PF3D7_1431200	X			X
PF3D7_1433000	X			X
PF3D7_1436000			X
PF3D7_1442000				X
PF3D7_1443300				X
PF3D7_1444400				X
PF3D7_1445100	X			X
PF3D7_1445400	X			X
PF3D7_1446100				X
PF3D7_1446200				X
PF3D7_1447000				X
PF3D7_1447400				X
PF3D7_1448000				X
PF3D7_1448100	X			X
PF3D7_1448700				X
PF3D7_1448800				X
PF3D7_1450200				X
PF3D7_1450300				X
PF3D7_1451000				X
PF3D7_1451500				X
PF3D7_1454200				X
PF3D7_1455400				X
PF3D7_1456300				X
PF3D7_1456900	X			X
PF3D7_1457100				X
PF3D7_1457700				X
PF3D7_1461200				X
PF3D7_1463400				X
PF3D7_1466700				X
PF3D7_1467200				X
PF3D7_1469300				X
PF3D7_1469400				X
PF3D7_1470100				X
PF3D7_1470200				X
PF3D7_1470300				X
PF3D7_1470400				X
PF3D7_1473900				X
PF3D7_1476000	X			X
PF3D7_1476200	X	X	X
PF3D7_1477200				X
PF3D7_1477300				X
PF3D7_1477400				X
PF3D7_1477500	X	X	X
PF3D7_1478000	X			X
PF3D7_1478100				X
PF3D7_1478600		X	X	X
PF3D7_1480000			X
