# Supplementary material for: Simultaneous genome-wide gene expression and transcript isoform profiling in the human malaria parasite
Source: PLoS One. 2017 Nov 7;12(11):e0187595. doi: 10.1371/journal.pone.0187595 (PMC5675406; doi:10.1371/journal.pone.0187595)
Supplement: S2 Table — All genes that were down-regulated on any array are represented in column A. The “X” symbol is used to indicate in which array and replicate the gene was found to be down-regulated. (CSV) [file pone.0187595.s002.csv]

Down-regulated Genes	Nimblegen_rep2	Nimblegen_rep1	Agilent_15K	Agilent_HD_exon
PF3D7_0102200			X
PF3D7_0102500		X	X	X
PF3D7_0105300				X
PF3D7_0105800	X			X
PF3D7_0106200	X			X
PF3D7_0107700	X			X
PF3D7_0108900		X
PF3D7_0109000	X	X	X	X
PF3D7_0109100				X
PF3D7_0111200	X
PF3D7_0111300				X
PF3D7_0111500				X
PF3D7_0202100		X	X
PF3D7_0203000				X
PF3D7_0203400				X
PF3D7_0204100				X
PF3D7_0206200			X
PF3D7_0206800				X
PF3D7_0207000				X
PF3D7_0207400	X			X
PF3D7_0207500	X			X
PF3D7_0207600	X		X	X
PF3D7_0207700	X			X
PF3D7_0207800	X			X
PF3D7_0208000				X
PF3D7_0208500	X			X
PF3D7_0209600	X			X
PF3D7_0210400				X
PF3D7_0210600	X	X	X	X
PF3D7_0210700	X			X
PF3D7_0211300	X			X
PF3D7_0212600	X	X		X
PF3D7_0212900	X			X
PF3D7_0214600		X
PF3D7_0214700		X		X
PF3D7_0214900	X	X	X	X
PF3D7_0217500	X		X	X
PF3D7_0217900	X			X
PF3D7_0220800	X	X	X	X
PF3D7_0301800			X
PF3D7_0302200	X		X	X
PF3D7_0302500	X	X	X	X
PF3D7_0303400	X			X
PF3D7_0304100		X		X
PF3D7_0306000				X
PF3D7_0306500	X			X
PF3D7_0307400				X
PF3D7_0307700				X
PF3D7_0308100	X
PF3D7_0308300	X	X	X	X
PF3D7_0308700	X	X		X
PF3D7_0309900				X
PF3D7_0310400	X			X
PF3D7_0311800				X
PF3D7_0312000				X
PF3D7_0316200				X
PF3D7_0317200				X
PF3D7_0318500			X
PF3D7_0318700		X		X
PF3D7_0319400				X
PF3D7_0320000	X			X
PF3D7_0320700	X			X
PF3D7_0321100				X
PF3D7_0321400	X	X		X
PF3D7_0323400		X	X	X
PF3D7_0402300		X	X	X
PF3D7_0404700	X	X	X	X
PF3D7_0405200	X
PF3D7_0405900	X	X	X	X
PF3D7_0407700	X			X
PF3D7_0407800	X		X	X
PF3D7_0408000		X		X
PF3D7_0413500	X			X
PF3D7_0414700				X
PF3D7_0414800		X
PF3D7_0414900	X	X	X	X
PF3D7_0415700				X
PF3D7_0418600		X	X
PF3D7_0419300	X			X
PF3D7_0419400	X			X
PF3D7_0419700	X			X
PF3D7_0423300			X	X
PF3D7_0423400		X	X
PF3D7_0423500			X	X
PF3D7_0423800	X	X	X	X
PF3D7_0424100	X	X	X	X
PF3D7_0424200		X	X
PF3D7_0424300		X	X
PF3D7_0501500	X	X	X	X
PF3D7_0501600	X	X	X	X
PF3D7_0503600	X	X	X	X
PF3D7_0504200	X			X
PF3D7_0504600				X
PF3D7_0504800				X
PF3D7_0504900	X			X
PF3D7_0505400				X
PF3D7_0507300		X
PF3D7_0507400	X	X	X	X
PF3D7_0507500		X	X
PF3D7_0508000	X			X
PF3D7_0508100	X			X
PF3D7_0508500				X
PF3D7_0508900				X
PF3D7_0510100				X
PF3D7_0511200	X			X
PF3D7_0513100	X			X
PF3D7_0513800				X
PF3D7_0515200	X			X
PF3D7_0515400	X	X	X	X
PF3D7_0515700	X		X	X
PF3D7_0516800				X
PF3D7_0517900	X			X
PF3D7_0518200	X			X
PF3D7_0520500	X			X
PF3D7_0522400				X
PF3D7_0522600	X			X
PF3D7_0522700				X
PF3D7_0525200				X
PF3D7_0525300	X			X
PF3D7_0525400				X
PF3D7_0525700				X
PF3D7_0525800		X	X
PF3D7_0528300				X
PF3D7_0528400	X	X	X	X
PF3D7_0530900				X
PF3D7_0531100				X
PF3D7_0603100	X
PF3D7_0603800				X
PF3D7_0604100	X		X	X
PF3D7_0605200	X			X
PF3D7_0605900		X	X
PF3D7_0607600				X
PF3D7_0607700				X
PF3D7_0608400	X			X
PF3D7_0610400	X		X	X
PF3D7_0611100	X			X
PF3D7_0611200				X
PF3D7_0611600				X
PF3D7_0612200	X			X
PF3D7_0612700			X	X
PF3D7_0613300		X
PF3D7_0613400	X			X
PF3D7_0613600				X
PF3D7_0613800	X			X
PF3D7_0613900		X	X	X
PF3D7_0614900	X			X
PF3D7_0616200				X
PF3D7_0617300	X			X
PF3D7_0617800			X	X
PF3D7_0618000	X	X	X	X
PF3D7_0618600	X
PF3D7_0620400		X	X
PF3D7_0621100				X
PF3D7_0625700				X
PF3D7_0627200				X
PF3D7_0628100	X	X	X	X
PF3D7_0629300		X
PF3D7_0630400	X		X	X
PF3D7_0701900			X
PF3D7_0702100		X
PF3D7_0703600				X
PF3D7_0704300				X
PF3D7_0704500	X			X
PF3D7_0705100				X
PF3D7_0705400	X			X
PF3D7_0707300	X		X	X
PF3D7_0715300	X			X
PF3D7_0715600				X
PF3D7_0717600	X			X
PF3D7_0719500	X			X
PF3D7_0722200	X		X	X
PF3D7_0722900	X			X
PF3D7_0723300				X
PF3D7_0723800	X			X
PF3D7_0725000				X
PF3D7_0725400		X	X	X
PF3D7_0726700	X			X
PF3D7_0727100				X
PF3D7_0728100				X
PF3D7_0729700			X	X
PF3D7_0730400	X	X	X
PF3D7_0730500				X
PF3D7_0731000		X
PF3D7_0731500		X	X
PF3D7_0802100	X			X
PF3D7_0802600				X
PF3D7_0802800				X
PF3D7_0803200				X
PF3D7_0803300	X			X
PF3D7_0805200		X	X
PF3D7_0805300		X	X
PF3D7_0805700	X			X
PF3D7_0806200	X			X
PF3D7_0806300				X
PF3D7_0807400				X
PF3D7_0808200		X	X	X
PF3D7_0810200				X
PF3D7_0810300	X			X
PF3D7_0811600	X			X
PF3D7_0816200	X			X
PF3D7_0817600		X	X
PF3D7_0817700	X	X	X	X
PF3D7_0817900				X
PF3D7_0818100		X	X	X
PF3D7_0819700	X			X
PF3D7_0820700				X
PF3D7_0821000	X			X
PF3D7_0822900	X	X	X	X
PF3D7_0827500	X			X
PF3D7_0828500	X			X
PF3D7_0828600	X		X	X
PF3D7_0828700				X
PF3D7_0828800		X	X
PF3D7_0828900	X			X
PF3D7_0829400				X
PF3D7_0831600	X	X	X	X
PF3D7_0902800				X
PF3D7_0903300	X
PF3D7_0903700	X			X
PF3D7_0904700	X			X
PF3D7_0904900				X
PF3D7_0905400	X		X	X
PF3D7_0905500	X		X
PF3D7_0906100	X			X
PF3D7_0907900				X
PF3D7_0908200	X			X
PF3D7_0908400	X			X
PF3D7_0908500		X		X
PF3D7_0909600	X			X
PF3D7_0910900				X
PF3D7_0911100		X	X	X
PF3D7_0911200				X
PF3D7_0911600				X
PF3D7_0913500	X			X
PF3D7_0913600	X
PF3D7_0913800		X	X
PF3D7_0914100		X	X	X
PF3D7_0914400				X
PF3D7_0914800	X			X
PF3D7_0915000				X
PF3D7_0916000			X
PF3D7_0916300	X
PF3D7_0917300			X	X
PF3D7_0918000	X		X	X
PF3D7_0919200		X	X
PF3D7_0919300			X
PF3D7_0919400	X			X
PF3D7_0919900				X
PF3D7_0920500			X	X
PF3D7_0920700				X
PF3D7_0923600				X
PF3D7_0924900				X
PF3D7_0925300				X
PF3D7_0926500				X
PF3D7_0927800	X			X
PF3D7_0929400	X		X	X
PF3D7_0929900				X
PF3D7_0930200	X	X	X	X
PF3D7_0930300			X
PF3D7_0932000			X	X
PF3D7_0932200	X		X	X
PF3D7_0934600			X
PF3D7_0934800	X	X	X	X
PF3D7_0935800	X	X	X	X
PF3D7_1001600	X			X
PF3D7_1003400				X
PF3D7_1003600		X	X
PF3D7_1004900				X
PF3D7_1007200	X		X	X
PF3D7_1007300		X		X
PF3D7_1008200	X			X
PF3D7_1009700	X	X	X	X
PF3D7_1010300			X
PF3D7_1012100	X
PF3D7_1012200	X	X	X	X
PF3D7_1012300	X			X
PF3D7_1013800			X	X
PF3D7_1014100	X		X	X
PF3D7_1014900	X			X
PF3D7_1015800				X
PF3D7_1017100	X		X	X
PF3D7_1017500		X	X	X
PF3D7_1018200				X
PF3D7_1019100				X
PF3D7_1019300				X
PF3D7_1019600				X
PF3D7_1021300				X
PF3D7_1021800	X			X
PF3D7_1022700			X
PF3D7_1022800				X
PF3D7_1023400				X
PF3D7_1024500				X
PF3D7_1025400	X		X	X
PF3D7_1025800	X			X
PF3D7_1025900	X			X
PF3D7_1026600		X	X
PF3D7_1027300			X
PF3D7_1028600	X			X
PF3D7_1028700				X
PF3D7_1028800	X			X
PF3D7_1028900		X
PF3D7_1029900				X
PF3D7_1030200		X	X
PF3D7_1031800				X
PF3D7_1034200				X
PF3D7_1034600				X
PF3D7_1035100	X			X
PF3D7_1035200	X			X
PF3D7_1035300		X	X	X
PF3D7_1035400	X	X	X	X
PF3D7_1035500	X	X	X	X
PF3D7_1035600			X
PF3D7_1035700				X
PF3D7_1035900	X	X	X	X
PF3D7_1036000		X	X	X
PF3D7_1036500		X	X
PF3D7_1036800	X			X
PF3D7_1037500		X	X	X
PF3D7_1100400			X
PF3D7_1104900		X	X
PF3D7_1105000			X
PF3D7_1106100				X
PF3D7_1107100	X			X
PF3D7_1108100		X	X
PF3D7_1110600	X			X
PF3D7_1110800				X
PF3D7_1112100				X
PF3D7_1113300	X			X
PF3D7_1116000			X	X
PF3D7_1116900				X
PF3D7_1117100	X			X
PF3D7_1118700	X			X
PF3D7_1120300				X
PF3D7_1121000				X
PF3D7_1121200				X
PF3D7_1121300	X			X
PF3D7_1121900				X
PF3D7_1122700	X			X
PF3D7_1123800				X
PF3D7_1124600	X			X
PF3D7_1125100				X
PF3D7_1125700		X	X
PF3D7_1125800		X	X
PF3D7_1126700	X	X	X	X
PF3D7_1127500				X
PF3D7_1128900	X			X
PF3D7_1129300				X
PF3D7_1133200				X
PF3D7_1133300				X
PF3D7_1133400		X	X	X
PF3D7_1136000				X
PF3D7_1136200		X	X	X
PF3D7_1136700.1	X		X	X
PF3D7_1137200			X
PF3D7_1137500	X			X
PF3D7_1138000				X
PF3D7_1138400				X
PF3D7_1140400	X	X	X
PF3D7_1140600				X
PF3D7_1141300				X
PF3D7_1141400	X			X
PF3D7_1141600				X
PF3D7_1141800	X			X
PF3D7_1143100		X	X
PF3D7_1145200		X	X	X
PF3D7_1146600	X			X
PF3D7_1149200			X
PF3D7_1201800				X
PF3D7_1202200				X
PF3D7_1204700				X
PF3D7_1204900	X	X	X	X
PF3D7_1205000				X
PF3D7_1206000		X	X	X
PF3D7_1207000				X
PF3D7_1207500				X
PF3D7_1207900				X
PF3D7_1208000	X
PF3D7_1211700				X
PF3D7_1214000				X
PF3D7_1214100	X			X
PF3D7_1215200	X			X
PF3D7_1215600				X
PF3D7_1218000	X	X		X
PF3D7_1220300				X
PF3D7_1221300	X			X
PF3D7_1221800				X
PF3D7_1222700			X	X
PF3D7_1223100	X		X	X
PF3D7_1224100	X			X
PF3D7_1224500	X
PF3D7_1227000	X			X
PF3D7_1227500				X
PF3D7_1228600	X		X	X
PF3D7_1229300	X			X
PF3D7_1229700	X
PF3D7_1229800	X	X	X	X
PF3D7_1230400				X
PF3D7_1232500	X			X
PF3D7_1232600				X
PF3D7_1232700				X
PF3D7_1232800				X
PF3D7_1233800				X
PF3D7_1234300	X			X
PF3D7_1234900				X
PF3D7_1235200	X		X	X
PF3D7_1235600	X			X
PF3D7_1236300				X
PF3D7_1236800	X			X
PF3D7_1236900	X			X
PF3D7_1238000	X
PF3D7_1238600	X			X
PF3D7_1242400				X
PF3D7_1242500				X
PF3D7_1243400			X
PF3D7_1243500	X			X
PF3D7_1245500	X			X
PF3D7_1246200			X
PF3D7_1246400			X	X
PF3D7_1246900				X
PF3D7_1247500	X			X
PF3D7_1249400	X			X
PF3D7_1249500				X
PF3D7_1249600				X
PF3D7_1251200		X	X
PF3D7_1251300				X
PF3D7_1252100	X		X	X
PF3D7_1252400		X	X	X
PF3D7_1301600		X	X
PF3D7_1303700				X
PF3D7_1306000				X
PF3D7_1307500		X	X
PF3D7_1310700		X	X
PF3D7_1312800				X
PF3D7_1313600				X
PF3D7_1315300	X		X	X
PF3D7_1317100				X
PF3D7_1318000			X
PF3D7_1318400				X
PF3D7_1318700		X	X	X
PF3D7_1319400				X
PF3D7_1320100				X
PF3D7_1320700				X
PF3D7_1321100	X		X	X
PF3D7_1322000	X			X
PF3D7_1322500	X
PF3D7_1323700			X	X
PF3D7_1324100				X
PF3D7_1325400				X
PF3D7_1325600	X
PF3D7_1326600				X
PF3D7_1328000				X
PF3D7_1328300	X			X
PF3D7_1330100				X
PF3D7_1330700	X
PF3D7_1331400		X
PF3D7_1331600				X
PF3D7_1332100		X
PF3D7_1332200		X	X	X
PF3D7_1333700				X
PF3D7_1334000				X
PF3D7_1334600	X			X
PF3D7_1334800	X			X
PF3D7_1335100			X	X
PF3D7_1335300		X	X
PF3D7_1335400		X	X
PF3D7_1337700				X
PF3D7_1337800		X	X
PF3D7_1338000	X
PF3D7_1338600				X
PF3D7_1338700				X
PF3D7_1340700	X			X
PF3D7_1342600		X	X	X
PF3D7_1343100	X			X
PF3D7_1343500				X
PF3D7_1343800			X	X
PF3D7_1344300			X
PF3D7_1344500	X			X
PF3D7_1345400				X
PF3D7_1346600	X			X
PF3D7_1348100	X			X
PF3D7_1348600			X
PF3D7_1349100	X
PF3D7_1351700	X	X	X	X
PF3D7_1355100	X			X
PF3D7_1356100				X
PF3D7_1356300	X			X
PF3D7_1356800	X	X	X	X
PF3D7_1358000				X
PF3D7_1358400	X		X	X
PF3D7_1359800	X			X
PF3D7_1361400		X	X
PF3D7_1361800	X		X	X
PF3D7_1364100	X			X
PF3D7_1364600				X
PF3D7_1401100			X
PF3D7_1401600			X
PF3D7_1403400				X
PF3D7_1406800	X		X	X
PF3D7_1409300	X			X
PF3D7_1409400			X	X
PF3D7_1410400	X		X	X
PF3D7_1410700	X			X
PF3D7_1410800	X			X
PF3D7_1412000	X	X	X	X
PF3D7_1413400				X
PF3D7_1413700				X
PF3D7_1414000	X			X
PF3D7_1414400	X			X
PF3D7_1415000				X
PF3D7_1419000				X
PF3D7_1419500				X
PF3D7_1420200				X
PF3D7_1422500	X			X
PF3D7_1422600				X
PF3D7_1423300	X	X	X	X
PF3D7_1425300	X			X
PF3D7_1427300	X			X
PF3D7_1428600				X
PF3D7_1430200				X
PF3D7_1432300				X
PF3D7_1432700	X
PF3D7_1432900				X
PF3D7_1434400		X	X	X
PF3D7_1435200				X
PF3D7_1435600		X	X	X
PF3D7_1436200			X	X
PF3D7_1436600	X	X	X	X
PF3D7_1437300	X		X	X
PF3D7_1438700	X			X
PF3D7_1439400				X
PF3D7_1439600				X
PF3D7_1440100	X			X
PF3D7_1440400	X
PF3D7_1440900				X
PF3D7_1441300				X
PF3D7_1441800				X
PF3D7_1442100				X
PF3D7_1443000				X
PF3D7_1448500				X
PF3D7_1449100				X
PF3D7_1449200	X		X	X
PF3D7_1450500				X
PF3D7_1451300				X
PF3D7_1451700	X			X
PF3D7_1452000	X	X	X	X
PF3D7_1452900				X
PF3D7_1453100				X
PF3D7_1453200	X			X
PF3D7_1455300		X	X
PF3D7_1455700				X
PF3D7_1455900				X
PF3D7_1457500	X			X
PF3D7_1458500	X			X
PF3D7_1458700	X			X
PF3D7_1459900	X	X	X	X
PF3D7_1460600	X	X	X	X
PF3D7_1461100	X			X
PF3D7_1461400		X	X	X
PF3D7_1462100				X
PF3D7_1463800	X			X
PF3D7_1463900	X	X	X	X
PF3D7_1468400	X	X	X	X
PF3D7_1469200		X
PF3D7_1470800				X
PF3D7_1471300				X
PF3D7_1472600				X
