# Supplementary material for: Simultaneous genome-wide gene expression and transcript isoform profiling in the human malaria parasite
Source: PLoS One. 2017 Nov 7;12(11):e0187595. doi: 10.1371/journal.pone.0187595 (PMC5675406; doi:10.1371/journal.pone.0187595)
Supplement: S4 Table — The Gene ID for each ncRNA is provided in column A and the RNAz_ID in column B. The normalized fluorescent intensity values of each differentially expressed ncRNA at the corresponding time point for HB3 is provided in columns C-F, and the differential expression between time points are represented as log2 ratios in columns G-L. (XLSX) [file pone.0187595.s004.xlsx]

## Sheet: Sheet1
GeneID	RNAz-ID	HB3_12hr	HB3_24hr	HB3_36hr	HB3_48hr	12_24	12_36	12_48	24_36	24_48	36_48
MAL13/243882-244060	1537	501.6	395.616	NA	199.386	0.342438	NA	1.33097	NA	0.988535	NA
MAL13/2799275-2799445	1891	3778.86	1651.61	2698.55	4353.6	1.19408	0.485765	-0.204256	-0.708311	-1.39833	-0.690021
MAL14/979596-979785	2132	3011.79	2363.92	656.978	930.779	0.34944	2.19671	1.69411	1.84727	1.34467	-0.502594
MAL3/307891-308090	2814	741.606	396.275	NA	231.024	0.90415	NA	1.68261	NA	0.778463	NA
MAL3/398132-398250	2846	1179.02	650.868	398.655	394.917	0.857148	1.56437	1.57796	0.707225	0.720815	0.0135897
MAL4/1185010-1185096	3256	6398.49	1784.67	2701.75	9674.13	1.84208	1.24384	-0.596401	-0.59824	-2.43848	-1.84024

## Sheet: Sheet2
Gene ID	RNAz_ID	Nimblegen	Agilent 60K	Northern	Sequence
MAL1/465720-465873	148	X	X		tatatatgtgtatatatatgtttcgtttctttctaaaattgttaccaatatatttggtatgcgtattacatgaaaaatttaacatatattttaaaattagttcttttaaaatatacttattatatgcacatttattgtatacattttacttaaa
MAL1/48287-48430	35	X	X		attcttaataggtagttgtataatatgaattataaggtaatataattactatcatcataataatcattatcatctgtcttttatgacagttatactgtcatataaaatttgcgaaaaaggtttcatttagatatattggaaaaa
MAL1/562126-562246	170	X	X		ccatatgtaaagaaataatttatcataaaatgcaattcatatattattgaaaagtaaaattcttcatattctaaaaaattaagtacttacataaatgtttcttgcattcatgtttccatga
MAL1/59416-59687	51	X	X		gcttgttttacgtttaataccacatattatgatatacaatgatacttatacaatagccatattgtgaacatacatgttgtaatatcaatttcacttatatgttattcccaattgtaaattatattttatgtacacgttcaagaactattactttacacatatgcatatattttacaacaaacaaatataagttctattgttactatatgttaacgtgttattgtaaaatataaaacaatattttaatggtaatttatcgtatgacataaaat
MAL1/616633-616682	213		X		catacatacatacgtggtttatatcgtggcatacatacatacgtgataca
MAL10/1139073-1139243	418	X	X		tatctatgtatgtatatacatgtgtggatataagtttattatatcttgtgtaggttttaaaattaaaaattgaaattcctcatttgaatgtagcatcataagaacatttatgatatgaggatttttaattttagatgtataaaattagggataaagaaagggtttctttgt
MAL10/258733-258825	295	X	X		ctttcgttttgttttccttttatttccagttgttattatattacgcatgcatcatttatttgcacacctattatatactttttatagataggt
MAL10/271753-271892	299	X	X		acttcattttgtgattattttatttaaaaaagacacattaaaccaataaatacacatatatttacaaaaatatacatgtatatatatatggacttgccatattatcatatgtaccatccttttttattcagtgtatatag
MAL10/273174-273239	302	X	X		cttacgtgtaataacactgaggaaaaatcatcattatacataacaaagatgaatgattaaataatc
MAL10/416036-416142	312	X	X		atttcatgataaaatacgtttacttgtgttttatcgttgaaaatccatgtaccttctccagtaggtttattttgtcgaaatctaccaacaaaatagatgcctaaaat
MAL10/947605-947888	380	X	X		gaaccttttgtacatatatatatatatatatatatatatagttgtttatataatgttcaagtcttatgggaaaaattaaaatcattatatatttcggataatgttcaaacgttatatgcaacataaacaatatttcattatatacaatatgtacatatatgtaataaacatgtataaaagtttttacatttttatattttcatatctgaagtgtaaagtacatatatatattcatatatttcgagaaaaatgttttattgtttaaaatgaatataggtgtactt
MAL11/1116008-1116068	856	X	X		gtaagtttaaagaaaacgtatatatggaaaaatatgggaaatgatatgtcaacatatatat
MAL11/1839112-1839193	952	X	X		cttaacctaagtctcttattttttcgagatatatttcaacaaccgatatggatatgtcagtgtcctgatgagatataaaaca
MAL11/228710-228826	671	X	X		aatagaatagaataaagattatgctgatacttgtttcattctattataatcatataggtattcatatttatacatataagctacatatataaatacttatgggcacttatacataac
MAL11/390127-390200	690	X	X		attgtgcacaaacttgtactgcataggatgctcacaatttataacatcttatgccctgattatcgtgctaactt
MAL11/42992-43250	597		X		gtgacaatggagaaaatagaaccatgtttttttatctatctctattatctataatatgtatccatatatagattaatacaatatagaactgaagattcatcatatttctaaaaacattatgttatcaagtatccaaatataataatataataaactcggaaagaataaataattcataaaggtgacaaatatgtatatacttaattattctgttattaaaaaaatacatataaatgtatctatccattttatacttatc
MAL11/510888-511009	709	X			ctactcctaaaaagcagtgcgtttttacacgcgcactgcaatgaaaaatatttcacattgcgacaaaaaaaaaaaaatttcacgcataccaaaaatttattctatatatatcataaatacaa
MAL11/557615-557686	719	X	X		gaaaaattatgtctttacaaaatgaatatatatcaaaaagtatacacttcataaaaacacttcttcagatat
MAL11/804991-805237	794	X	X		tgtgaatacacatttgattgtcccatatctaatagttattcttctttatttttaatcatctttaatttttatttttttttttttttagtcttgaatagaaatatttgataattgttttaatattcttcattcaaaatatatagtttcattgttctaaaaaattgtaaacccaatttgaatttaatactttggttattctttatgaaatgctatgtattatttaaaatccaatcctgaaactatcttc
MAL12/1252815-1253072	1219	X	X		tatttttcctaacacataatatggtagttccatgacgaggaattatcaacttgctgttatcagaaaaataatttctctataaaataagaagataaaatcatacaaatatatatcatttgtttcaataaaaattattatgacaacataaatgtgataaacatatatgtataatatattacagcaattgttttggttattgatttttgtgatccaattatatttacaaagtttctgataaacattttctttcttgtttcg
MAL12/1297315-1297410	1223	X	X	X	tttcccaaatctggtaaacacaaaatctataggtttttgtgtgcgtgcaataattattacataacaatatacacactattgattaaagagaaaatg
MAL12/1516930-1517011	1256		X		taaacgtttcatgttacatacatatgaatatatatatgtactaattagtagtttacggttaaacgtttcatgttacatatga
MAL12/1518573-1518702	1258	X	X		tatatctatttcaaatgtacttatatgattcttatatataactagatgatatgctcatatataaatcatgtgtacgtattgagtatctacttcataggatcgttatatatgcacatatatatgtatacat
MAL12/1561446-1561521	1277	X			tataaacatatgaacatataaacatgtgaacatgtgaacatataaacatatgaacatatgtacatatcttttatat
MAL12/161842-161903	1075	X	X		ctcgtttctactttcctctatctgtagttctaacatatatatgtaacttcatatatccatat
MAL12/1715356-1715487	1300		X		cttttgtaaataacaaatcatctctaataaaacttaaatacacttatatgtatatatgcactgtatatccatataaaggttcataccttttagtattaaaacattattatgtatgaaatgttatatggtcat
MAL12/1745293-1745457	1320	X	X		gggtaacccaacagctcgatctgcaacttttcctatgaaattgtcggcaagcggagtcgaaccaacgttctcacaaggaaaggcaacatacctaacgattgggctactgaggcagcttaatattagtactaatataaaagtaatattaaaatggaatgtatgcac
MAL12/1857766-1858022	1335	X			tatggaatgttcgacaggtacatttttcgcgttgaaaaaataacactatgagaaaaaaaaacttataatatcgttgacgaatacttagtcaagatcattgctatagtatttgtgatgttttattgttataaacaaacagattttcaaaagtgatgatgaacagacgctgctctaaattgaattgttttcgaatttttcaacttcttaggaaattgtaaaacttccgaaaaattacatgatattattttgttggcaaa
MAL12/354467-354531	1101	X	X		ctacttttatttttcataatatatggaaatcttattatatatgtaaccagctaattgtcttaaca
MAL12/659493-659644	1132	X	X		attgtagtgtgccaaattagcacacacatatatacatgaatttatatgtgtactaactatattcttaaatgttagttcataacaacaattttcataattttaagaaatgattattccttattattttcaaaattataattctctccatgtag
MAL13/1042932-1042987	1644	X	X		ggacataaaaatagggtatatgaaaagtatgcaaatgtaattacatttgttcatac
MAL13/1213708-1213907	1678	X	X	X	ttgtattgatatttctcttcatattcccggtattttcaacgcccataatagggcagcttcttgttaagtagtgttgattttgccgtaacaaaacggagaggaacaaatataaatgaaataaaaaatatgtaaaaataaatgaatattatatggtatatctaacattatatgtatgtattattctctcaacttcaataagg
MAL13/1349736-1349797	1705	X	X		gtgtataatatgatacatatgtacaaataaatgtaccaacatgtatacaaaaattacacaaa
MAL13/1676588-1676677	1750	X	X		aaaaatatacactcatagatgcaacatgtaagtatacaaataaatatggtatgtagagtacgttataatattgatcaaataagtgttttt
MAL13/243882-244060	1537	X	X	X	catatcaaacctacgctcaactgagtaattgttgagttcagttatactcaggactcgcaagttcatcgtatcaattattttcatcatgtggttttataaattctctttttaaaaaatatttttatactttcttgtattttatattatgaagttttgaacatttgttttaaacaatttcc
MAL13/2799275-2799445	1891		X	X	aaagtatttgatttgatgttaggaaggcaaatccgccgaatttaagcatataattaagcggaagaaaagaaaataacaatgatttctttagtaacggcgagtgaacaagaaaaagctcaaggagataattctatatcgtagttgtaaaaagactatgtgtatagaaattgt
MAL13/2801236-2801354	1895		X		gctgaaaagtgtttaaaagaagtaagatattatatggaaatatataattagatcttcgtctcaaaagggaaacaggttaatattcctgtgccaaatagaagtaagggtgtgaataaaga
MAL13/477337-477393	1571	X	X		atgaacatattaaaattgtacatatgtacaatatgtaattcgtaagctattatgcac
MAL14/1062828-1062952	2148	X	X		ttttttcgtagaataataaaaactaatgatttgttcaatggaaaaattctcaaaagaattcatgaacaatgaaatgtttttatttagctacacaatgttatataaatgaaaatatcttcatgaca
MAL14/1147523-1147685	2162	X	X		aatatgtgtaaatcaaataagtacataaaaatagggtgtatgtatttgtgctacttcatgaaaaatacatagagatatctatttatgtatttataacataatatttatgtctgttattatacgaatgatataatatgaagtatttatttatgcatgcaaatat
MAL14/1184520-1184577	2167		X		tatagttatgtatacttgtattgtagtgtacatacacttatgttttaatgtacataca
MAL14/1213620-1213702	2172	X			ctcataaaaaagtaaaagaaagcacacacacatgtatatatgtatgtgtgcatatatatatgccctcgttgaactcctcccac
MAL14/130040-130112	2022	X	X		atcataaatttctttaattttatctagtaacgattcattatgttttaataaatcatactacaatggaataaga
MAL14/133308-133411	2023	X	X		aatatactcataaatgatttgctaatttgaaaatacagaaaaataaatgtataaattagtaatgagaaatgatgttatattcatttatatgcttttgaattcta
MAL14/2206256-2206343	2289	X	X		ttattattatcatatggaatatatgttctatgtatttatatcataatatgaccataaagagttacatgcttatcacatgaacatatc
MAL14/2495738-2496264	2346	X	X		gcacctctgaatattttaaagaatgcattaatttatcatattcttccttttccttttttataatttcttcatagtccctcttttgttccctaacatacccaattaaggtataaaactaattagcatattcatacatttattacacaattaattcttgtgtaaaaaaaaaaaaaaaaaaaaaaagaaattaagactcttaacatacatgagttcctgatacttattttgtaaaatagaggattcctccgtctttaacaccctataaagaggggaacactcagaaatataaatatatgaatatataaatatttatagatttatttaattttatgcttaccaaaagacattctgcaatcccactttttcagacttcactttatcatcatcaactaattgttg…
MAL14/2686297-2686383	2360	X	X		gtaagtaaattaaggattacatgaggtatttatgtgtgacaccttgatgaaaatgctttccatcgtaaagatttttttgagaacttt
MAL14/2940775-2940854	2389	X			accacttcaaaaaatcgagaagctgttaaagctgaccataaaatacaaaaaaaagatatacaatatccttttttagatct
MAL14/46658-46769	2017	X	X		ccatcagcataattttaaatttattgaaacaaatatgaataaatatttgagaacataataaactttaatctattagtgtagaaatatccaataaattaagaattttacacac
MAL14/979596-979785	2132	X	X	X	ataatataaatgctgatttaccacagtggcaactaatttttcttcatttactgtttactgccagaaatcagctaaatcgatttcataattttaggaaccatagaaaaaattgagaatttttttttgtgggccgtatttatgaatacaaatattctaattttatgaaacgattattttgaattcattacat
MAL14/981735-981791	2134	X	X		tgatgacaaccttttcataatataaagcctttcgggtctgaagagcattatgatgat
MAL14/987856-987928	2137	X	X		cctttttcatttatactttcattatgttctcctcttgccattattgtgtaagatgattttcttcgtcactttg
MAL2/297921-298001	2562	X			ctttcttgtacatccgtcttaaagaacaaacaaacaaaaaaaaaacttccttgtttcttttatatgtgcattaacacatag
MAL2/321455-321509	2573	X	X		atgtgttctttttaataaagaactttatgccttttaagaagtgttacaaattatg
MAL2/34632-34847	2482		X		atgttacaatatagtaataatacaacatatttttgtgttgtaaattatttacaaatgtgtaaaaccaactttttgaaaattgtacatgacatatatatatatatatataataacattttaaaacatatatatgaagtatatatgaaatagttattaaaacatatatgttcgtaatttttctgttataaaaacaattaacaacaaacattctttatc
MAL3/1023638-1023850	2953		X		gataaagaatgtttgttgttaattgtttttataacaacaatgttacgaaattatatgttttaataactatttcataagtatttcatatatatatattataaattggtattatatatatgtcatacacaatttccaaaacgttggttttgcacatttgtaaataatttacaacacagaaatatgttgtattattactatatcattagatattat
MAL3/307891-308090	2814	X	X	X	acgtatcttcatatatattccatttgtgttccatgtgtttatataaatgaactacgtgggtcaaaaaatggataaagaaaattaaggagatatattactttatttcattttttgttgttttattaatacataaaaaaaaatagtatatttcttcaacaacatataatatataaaagaatcgcattgtctttgtgttatag
MAL3/398132-398250	2846	X	X	X	ttaatctttttttataagaattatttcaatcagattgtgatgcatgaaaaaatatcttcatggttatatacttcagatgagctgggtaatgtttatcatcatattgaaataattcttac
MAL3/667147-667198	2903	X	X	X	cttgtgctcatgtcaaatgggtacaattcatagaaaatcatatacaatgtat
MAL3/682439-682599	2914	X	X	X	gatttatatacacatttgtacattggtatgaaaacacaagttaacatattaaaaaatactcttattattttattttattttgcccccatgcagaccaaaataaaatgagaaaaaatccgttacattgtttttgtgcctttgtgaatatgataagacacgaa
MAL3/691489-691562	2916	X	X		aacattactcttaactcttttggataccaacttatccatctaaacacaactcgagttggatgtgtgaacttttc
MAL4/1064246-1064397	3230	X	X	X	tttttattacctgtataaagtcatgtgattgcctgtgcaaagtcatgtgattgcctgtacaaagtcatgtgattacctgtacaaagtcatgtgattacctgtacaagtcatgttgcatatatgataacaatgcggaataagatataattgag
MAL4/1185010-1185096	3256		X	X	acgatttcgattttttggtatcttccatttcgattttcatatttttcgcacttacattgctatggatttcgttacttccatatttta
MAL4/546379-546439	3112	X	X	X	gcctaaggaaattttatgaggacaagaatgtcccatatttatcatccctaatataacaaac
MAL5/105778-105973	3308	X	X		gtattgaacaattaaggaaaaacatgtaagtttatacaatatatagtaatgaacaaaataaataaccatataggtatataaattcttttatatgtatttctttgtacacatttttatatatatctaaggagatacctataattccaatattcagaggggtgaattgttatattttattctattctcttcatctacc
MAL5/247528-247577	3332		X	X	tattattccaacctttgaacctttgtccttaggtagaaaatattcttttg
MAL5/344258-344585	3346	X	X		gtgcttgattaataaatgtttcctgcttaaaatatttgtcaattcaaaatataacaattttacatatatctaattatacctattttcctttttatatgttttacataatttgttatatttcttatttctctctcctatacaaaaatgagagttcatgttaagagagaaataagatttcaagtctcctcctttccactccgtattcatccattttaataatatatcattatacgcaaatagttattattaacaaaataaataaaactaaattactaattatttcatttataatatgtattagacatatatattataaatacagtgtacc
MAL5/355573-355705	3351	X	X		ctattaatatacttgataggtacttccccctccaagtataatattatcatattacatatttgtatataataatatctattatgcattttgttgcatgtatcatatgatatataataatatatgtaaagatgtt
MAL5/465774-465841	3370	X			catcgtcttctttaccgaagactgcagcataaatatatagctattaaggcgatgaagaaaaaactgcg
MAL5/605599-605744	3390	X	X		tacatatacatataatatacatatgtaaaattttcaaacacattttaatgtatatgaaagaaatgaaaaactccttgtacctattaaaaagactaaaagttcaactataaggaaaagataacactagttaaaaagataaatgaagg
MAL6/1339986-1340131	3751		X		caacaaacattgtttgtcataataaatgatataaaatctttctaaaataatgatatatatatatatatatatatattaataaatcaatttcgatataatatgttatttgttttgttctaaaatttgttgtatgttataaaattccc
MAL6/588905-588953	3625		X		gtacaaacctcacatatacatatgtgcaatgagaaatatgtacattgct
MAL6/739654-739774	3650	X	X		tttccttcaaatacacatacaaatgtgtagaacaatagttgttatggttatataccacatatatatcataatagatttcattatttttatcaaataaatatcctaaaatatactctaatgt
MAL6/914887-914993	3680	X	X		agtggtgtttggaagtccatttagtgacacctatccatcatttatttggaaatcacttaagaagagtagaaaaggaaaagacatttttaatccttttttttatgctt
MAL6/983863-983946	3692	X	X		gctccatattttccttatattacttgggaatacatataaatatatacacatatattcatacctttttatttactttatttttga
MAL7/11004-11246	3812	X	X		tcataactatttatgttaatgtcgtaattgtgattttagtacttcattcttcattgtttcaggtactgtttgtgtatttgatgtcataaattttgcatgctgtgtttttaatcgtcttttttatcatgcaacatttgcatgtcctcttctatactataaaatgcctctttttgcatgcaattttacctttattgcacacatttatgcacctatatgcaggttacatcatcatagatgcacaca
MAL7/1445501-1445724	4131		X		gttatacaatatttgttgttaaattgttttataataacaatattagaaacatatatgttagaataactatatcatatgtatttcatatatatgttctaaaatagtattatatatataattcatagagaattcccaaaactatagttttacacatttgtaaataatttataacacaagaatacgttgtattattactatatcataaagtgttatgaaaattatga
MAL7/1449277-1449453	4136	X	X		ttcacaattgtaattctattagaatatattttaggatatttatttgataaaaatcataagagttatcattatatatatgtggtttatacgcataacaactattgttctacacattggcatataattcacaacacaaaaaacaaattgtttttaattacagatttacttgttatgtag
MAL7/1453368-1453578	4139	X	X		caaaaacacgttacgatacagttacaatagaacttatatattttttgttgtaaaataaatacatatatgtaaagtaatagttattcaatgtgtatatcacatataatttacaatttggaaaaacatataagtgaaatggatattgcaacatgttcacaaaattgttatcatataagaatcattgcatatcataatatttgttattaaaagt
MAL7/184689-184743	3915	X	X		tcgtgcacatttggaaaattacagaaatatacaatgaataaacatcattataatt
MAL7/297554-297630	3917	X	X		ttaattagggttaattataacacaaatgtaggtaacttttaatatataaatatgtgtgtacatttatgcttctttca
MAL7/51465-51673	3847	X	X		caaatattatgatatgcaatgatttttatatgacagcaatatagttaacatacatgttgcaatatcaatttcactaataggtttttccaaattgtaaattatatgtggtatacacgttcaacagccattaatttacacatatgtatatattttacaacacaaaaatacgttgtattaatactatatcgtaacatattattacaaaatat
MAL7/594185-594270	3968	X	X		catatgtatgtttttatttgaacaattaaaatggaaatgttatattatgtttaattatgtatcatattaacaaagtatatatatag
MAL7/597032-597108	3971		X	X	gattacaattttgtaatataccacaattaacttcagtaataatatgttccatcattggaacctgaatatatattctg
MAL7/619990-620126	3979		X		gtagtaatagttgctaaaggtgtacaatacatttattagaacatataagtatataatacatattccaacagaaacatatcattgcatgtatataaaacatttaacaacaaacattgtgtatcataatatatgatatg
MAL8/1272089-1272432	4420	X	X		gattttggctagctggctagctattttgtgtatggaaaatgaagataatatgaggatattcaaatatcctatattttgaaagtaataagatatatgtatgctaagtgagtaacatattttcattatgttttcttcatttattatgataaagtacttaaattaatagataaatcttttaaagaatcttgcaaatgtttaattttattttttaaaatatgaaaaagttctttataaagaaaagtctatgctttctatgtttgatgtaatattgtagtacatagaaaaagattttatggtccctttgatatagataaggccatgataaattttaaaactataagttg
MAL8/1288139-1288201	4431	X	X		tgttttgtagtaatagtaattcgtttgttgtacgaattatccaaagttgtatggactatccat
MAL8/1384160-1384384	4465	X	X		tacacaatgtttgttgttcatttttttttttataatagcaatattacaaacatttatgttagaataactatttcatcagtatttcatatgtatgttctaaaatgatattacatatatatgtcatataaaatttcataaactatggttttacacattttaatataatttacagcacaggaatacgttgtattattactatatcgtaaaatgttattggaaaatatg
MAL8/1400290-1400440	4472	X			gagcatacgtattctctcaacatatatatatacataaaggcatacgtattcttccaagatatatatataatggcatacgtattcctccaacatatatatatacaagagcatacgtatttttcgacctacatatatacaagagcatacgtat
MAL8/240995-241056	4268	X	X	X	ttgcaatctattcacttactattaaaccatattattaaggaattagtaaactaaacgattgc
MAL8/270003-270059	4274	X	X		ataaaatgataaataaaagggtgcttattaatcctttgcaaccattctttccaccta
MAL8/398524-398598	4302	X	X		acacatatgtatatagacatgtgcaaatgtatgaatgtacacacgtgcatttttatatgtttatatgtttattta
MAL8/451144-451345	4317	X	X		catatcatatattatgatacacaatgtttgttgttaaatgttttatatacatgcaatgatatgtttctgttggaatatgtattatatacttatatgttctaataaatgtgttgtacacctttagcaactattactacacacatttgtatataatttataacagtaaaatatgttatattattacaatatctcaatgtgtttt
MAL8/458700-459007	4327	X	X		gcacaacatattttaccatctcatatattataatatatcatatttatgttggtgcattatacataaagtttatgtagattggacgaaaaatatcgatatatataattatttgtatatttatgtatgttagattggtttagtatgtagttgtatttctctatttatatgtatattttgagtgtaaccacgggtatatagttataaagattgttcactctgtgttggcatgtgaatggatgcataaaaaattaatgtgtttatttatatatatatctatgttgatataggtatggtttacaggtttaggg
MAL8/660718-660779	4343	X			ttttacttataaaaaatgacatatagggtaaaatgtatataaacatttatatctacatatta
MAL8/949517-949669	4389	X	X		gaataaatacacacgagaaatgaaagtagcacattatcacacctgacatattattcatgtgtacatattatatgtatatatttacatgtatatggaagtttgttttttcccatttttaatgttataattgtgaataatatatctcatatgtat
MAL8/97578-97856	4238	X	X		tgtgcacgcttattacacatatcacacattttgaacatccaagcgcgtacacaaaatattcacatgtttcctctaaacatatacactcgcatatttgatagactccttggtccgtgtttcaagacggtcggtttaagagagtattttttataaacaacttatacaatatgtaaaaacaaaaaatataaatactttctacacctttacacatatattttttattcctaagtaaatagaaatgtttttaatcagaaaaaagtgttttccattcattcattc
MAL9/1075300-1075530	4694	X	X		catcttgggggtgatcttatttgaaataaaggaattttacatatgggctataattacttatactttttcaatataacaaatcttatatattattttccataagtaaatatatattcaattttttgtagagccttcctttttatattcattatgataagattattttgtcattttgattatactgaatgacatcatttctatatattcatttaacaaaaaaatgtaacttcc
MAL9/1132456-1132606	4711	X	X		gtggttatagtcagctttgtattgcaatgtatccatttctttatttttttttatttatacatatatactttttttccatctttaaaaatgaaaataacatataaatgatatgtaaataatatgtacatatttatattgtattccatttttc
MAL9/125006-125093	4583	X	X		tttcttacacgaattttaaattcaatattaaacatacaaacaatattaaattataaagtaagaatagatttaacaaatgtataagaaa
MAL9/1260227-1260490	4739	X	X		cataacattatattactcgtttgcaagtattttattcttcatgttcgtaaatcataaaaaattgcatacgtgtatatttatgtaagcacatattgaattatatgatttaattctggaatggtgctaaatcttaagaattatccttataaagaaaaaataaaattatacatatatatatatatatatataataaacaaattaacaaatgcacgaatataagaatgaataaacaaagggatgatataagaatacttaatttttccg
MAL9/1297474-1297562	4764	X	X		caaacatattgttaagttttacaaacatatggataatatgagaagagctttacatatccacattgcttatatatttacaactttgtgtg
MAL9/1364119-1364181	4783	X	X		gttacatgttttagttgttttcacatacaatatttttattaaggtaatacttaacatataaca
MAL9/1402397-1402461	4792	X			ttgtttgtactcctcgagcaccacaccattcttgtcttttttttgaaatggtatgatgatttttc
MAL9/1532022-1532262	4838		X		gtgtgcatctatgatgatgtaacctgcatataggtgcataaatgtgtgcaataaaggtaaatttgcatgcaataacaacgattttaagtatagaagaggacatgaaaatgttgcatgctaaaaataatgactaaaaacacagcatgcaaaatttatgataacacacacacaaagtgcactacaaacaataaagaatgaagtattaacatcgcacgtaccacattaacacgaatagttatga
MAL9/19955-20066	4498	X	X		atatcacaatactcccataacatacgcaatacgccaccaccaccgcccacacttaccatgtatgccacgatataaaccacgtatgtatgcatgtatgacatcatgtagtggt
MAL9/363244-363344	4607	X	X		tagacaatggttacattatataaatgtatatattgttaaatgtgtctttacatatagcttgttataataatagacgggtaaatatttcatatttacacaaa
MAL9/762972-763080	4653	X	X		gagaaaaatgttttcattcatggagctgttaactcggcgtgaatacaataacaggttgtttcattacatacatgaatacgatagacaaaaactggcgaagatacatttc
MAL9/9332-9739	4493		X		ctaacatgactactaacgtcataacttagatgttgactgacatgatgactgacataactactaacatcatgagtgacataactactaacatcataagtaacatgtctactaacatgactacttacatgactacttacatgactactaacatcactaacatcataactaacatagtaagtaacaacatcactaacatcattactaacatgactactaacttgactactaacaacatcactaacatgactacgtacatcatcactaacatgactacttacatgactactaacttgactactaacatgatcactaacatgtctactaacttgactactaacaacatcacttacatgattacttacatgaccactaacatcataaccaacatagtaactaaca…
MAL9/937155-937259	4677	X	X	X	catgtaaatatttgtgggtaaaatatgtatttaagaatcaagacaaatataacgagtgttgatgaaatgacatatgtatatatctctcatcacccacatgtgatg
